# Supplementary material for: Neutrophil–lymphocyte ratio is prognostic in early stage resected small-cell lung cancer
Source: PeerJ. 2019 Jul 29;7:e7232. doi: 10.7717/peerj.7232 (PMC6673426; doi:10.7717/peerj.7232)
Supplement: Supplemental Information 2 [file peerj-07-7232-s002.xlsx]

## Sheet: Munka1
Supplemental Table 2. Major clinicopathological characteristics of resected SCLC patients according to high versus low high platelet to lymphocyte ratio (PLR) and cohorts #1, #2, and #3 (n=189).
		Nationality
		Hun					Ita					Rus
		PLR				P	PLR				P	PLR				P	P*
		LPLR		HPLR			LPLR		HPLR			LPLR		HPLR
		Count	Column N %	Count	Column N %		Count	Column N %	Count	Column N %		Count	Column N %	Count	Column N %
Gender	Male	23	0.621622	22	0.6875	0.5667	11	0.785714	21	0.75	ns	22	0.88	15	0.789474	0.443	0.3
	Female	14	0.378378	10	0.3125		3	0.214286	7	0.25		3	0.12	4	0.210526
	Total	37	1	32	1		14	1	28	1		25	1	19	1
Age	<65	31	0.837838	24	0.8	0.69	5	0.357143	8	0.142857	0.7291	22	0.88	18	0.947368	0.6221	<0.0001
	≥65	6	0.162162	6	0.2		9	0.642857	20	0.857143		3	0.12	1	0.053
	Total	37	1	30	1		14	1	28	1		25	1	19	1
Smoking	Non-smoker	2	0.0666667	0	0	0.55	0	0	0	0	N/A	8	0.32	4	0.210526	0.7152	N/A
	Smoker	25	0.833333	15	0.882353		14	1	28	1		15	0.6	13	0.684211
	Ex-smoker	3	0.1	2	0.117647		0	0	0	0		2	0.08	2	0.105263
	Total	30	1	17	1		14	1	28	1		25	1	19	1
Preoperative CHT	No	13	0.448276	14	0.482759	0.7924	11	0.785714	24	0.857143	0.6685	24	0.96	18	0.947368	ns	<0.0001
	Yes	16	0.551724	15	0.517241		3	0.214286	4	0.142857		1	0.04	1	0.0526316
	Total	29	1	29	1		14	1	28	1		25	1	19	1
Adjuvant CHT	No	0	0	2	0.0909091	0.1391	4	0.285714	12	0.428571	0.5051	6	0.24	7	0.368421	0.3551	0.037
	Yes	23	1	20	0.909091		10	0.714286	16	0.571429		19	0.76	12	0.631579
	Total	23	1	22	1		14	1	28	1		25	1	19	1
Thoracic RT	No	4	0.307692	4	0.307692	ns	8	0.571429	20	0.714286	0.3545	21	0.84	14	0.736842	0.4674	0.025
	Yes	9	0.692308	9	0.692308		6	0.428571	8	0.285714		4	0.16	5	0.263158
	Total	13	1	13	1		14	1	28	1		25	1	19	1
PCI	No	6	0.428571	7	0.5	0.7047	13	0.928571	26	0.928571	ns	21	0.84	16	0.842105	ns	0.0004
	Yes	8	0.571429	7	0.5		1	0.0714286	2	0.0714286		4	0.16	3	0.157895
	Total	14	1	14	1		14	1	28	1		25	1	19	1
Stage	I	16	0.571429	7	0.259259	0.0013	7	0.5	12	0.428571	0.9077	8	0.347826	10	0.526316	0.1762	0.0713
	II	11	0.392857	8	0.296296		3	0.214286	7	0.25		8	0.347826	2	0.105263
	III	1	0.0357143	12	0.444444		4	0.285714	9	0.321429		7	0.304348	7	0.368421
	Total	28	1	27	1		14	1	28	1		23	1	19	1
pT	1	14	0.5	10	0.357143	0.2392	1	0.0714286	6	0.214286	N/A	3	0.130435	4	0.210526	0.6888	N/A
	2	11	0.392857	10	0.357143		10	0.714286	14	0.5		16	0.695652	13	0.684211
	3	3	0.107143	5	0.178571		2	0.142857	6	0.214286		4	0.173913	2	0.105263
	4	0	0	3	0.107143		1	0.0714286	2	0		0	0	0	0
	Total	28	1	28	1		14	1	28	1		23	1	19	1
pN	0	22	0.709677	9	0.3	0.0031	8	0.571429	17	0.607143	0.4677	10	0.4	10	0.526316	0.329	0.03
	1	8	0.258065	14	0.466667		4	0.285714	4	0.142857		9	0.36	3	0.157895
	2	1	0.0322581	7	0.233333		2	0.142857	7	0.25		6	0.24	6	0.315789
	Total	31	1	30	1		14	1	28	1		25	1	19	1
Vascular involvement	0	16	0.571429	13	0.5	0.5989	N/A	N/A	N/A	N/A	N/A	18	0.947368	11	0.846154	0.5518	0.0043
	1	12	0.428571	13	0.5		N/A	N/A	N/A	N/A		1	0.0526316	2	0.153846
	Total	28	1	26	1		N/A	N/A	N/A	N/A		19	1	13	1
Tumor necrosis	0	3	0.107143	7	0.259259	0.1771	1	0.0909091	3	0.130435	ns	11	0.578947	9	0.692308	0.7128	<0.0001
	1	25	0.892857	20	0.740741		10	0.909091	20	0.869565		8	0.421053	4	0.307692
	Total	28	1	27	1		11	1	23	1		19	1	13	1
Peritumoral inflammation	0	2	0.0714286	1	0.0769231	0.69	N/A	N/A	N/A	N/A	N/A	18	0.62069	10	0.769231	N/A	<0.0001
	1	11	0.392857	14	0.0769231		N/A	N/A	N/A	N/A		1	0.947368	2	0.153846
	2	11	0.392857	9	0.692308		N/A	N/A	N/A	N/A		0	0	1	0.0769231
	3	4	0.142857	2	0.153846		N/A	N/A	N/A	N/A		0	0	0	0
	Total	28	1	13	1		N/A	N/A	N/A	N/A		19	1	13	1
Operation	Lob+seg	36	0.972973	25	0.78125	0.0131	12	0.6	24	0.923077	1	18	0.818182	9	0.6	0.1	0.0018
	PNO	1	0.027027	7	0.21875		2	0.4	4	0.077		7	0.181818	10	0.4
	Total	37	1	32	1		14	1	28	1.00008		22	1	15	1
HPLR: high platelet to lymphocyte ratio, LPLR: low platelet to lymphocyte ratio
The differences in case numbers according to each variables are due to data availibility
N/A: Data not available or statistical test was not performed due to low case numbers
P: Chi-square (Fisher's exact) test, green highlight indicates statistical significance
* Chi-square test, comparison between all three cohorts
CHT: chemotherapy
PCI: prophylactic cranial irradiation
RT: radiation therapy
Lob: lobectomy
Seg: segmentectomy
PNO: pneumonectomy
