# Supplementary material for: Neutrophil–lymphocyte ratio is prognostic in early stage resected small-cell lung cancer
Source: PeerJ. 2019 Jul 29;7:e7232. doi: 10.7717/peerj.7232 (PMC6673426; doi:10.7717/peerj.7232)
Supplement: Supplemental Information 5 [file peerj-07-7232-s005.xlsx]

## Sheet: Sheet1
ID	Nationality (1-Hun, 2-Ita, 3-Rus)	OS (months)	Status (1-Deceased, 0-Alive)	DFS (months)	Status_DFS (1-disease progression, 0-no signs of progression or deceased)	OP_type (2-Lobectomy+segmentectomy, 3-pulmonectomy)	Gender (1-male, 2-female)	Smoking (0-non smoker, 2-smoker, 3-ex-smoker)	Pathological_T (1-T1, 2-T2, 3-T3, 4-T4)	Pathological_N (0-N0, 1-N1, 2-N2)	Stage (1-I., 2-II., 3-III.)	Preoperative_chemotherapy (0-no, 1-yes)	Adjuvant_chemotherapy (0-no, 1-yes, 3-suggested)	Thoracic_radiotherapy (0-no, 1-yes)	Vascular_involvement (0-no, 1-yes)	Tumor_necrosis (0-not present, 1-present)	Peritumoral_inflammation (0-no peritumoral inflammation, 1-mild, 2-moderate, 3-extensive)	Age	Preop_neutrophyl count	Preop_lymphocyte	Preop_platelets	PLR	NLR	PLR (1-LPLR, 2-HPLR)
1	1	128.2	0	128.2	0	2	2	x	1	0	1	1	1	1	0	0	1	60	4.576	3.168	185	58.3965	1.44444	1
2	1	58.2	1	58.2	1	2	1	1	2	1	2	x	x	x	x	x	x	60	4.697	2.079	130	62.5301	2.25926	1
3	1	47.2	1	47.2	1	3	1	1	x	x	x	1	x	x	x	x	x	56	2.9898	3.4428	230	66.8061	0.868421	1
4	1	100.6	0	100.6	0	2	2	1	1	0	1	1	1	0	0	0	3	57	8.771	5.907	403	68.2241	1.48485	1
5	1	164.3	0	164.3	0	2	1	0	1	1	2	1	x	x	0	1	3	44	4.209	1.932	139	71.9462	2.17857	1
6	1	76.9	0	76.9	0	2	2	1	3	0	2	0	1	x	0	1	2	56	6.138	2.574	191	74.2036	2.38462	1
7	1	29.9	1	7.3	1	2	2	1	1	0	1	0	x	x	0	1	1	59	4.897	2.158	165	76.4597	2.26923	1
8	1	37.7	1	37.7	1	2	1	1	x	0	x	1	x	x	0	1	1	55	4.004	2.387	184	77.0842	1.67742	1
9	1	74.8	1	49.2	1	2	1	1	2	0	1	0	1	0	1	1	2	68	4.536	2.349	182	77.4798	1.93103	1
10	1	138.2	1	138.2	1	2	2	0	2	0	1	0	1	x	1	1	2	64	8.28	2.88	237	82.2917	2.875	1
11	1	73.1	1	73.1	1	2	2	x	2	0	1	1	x	x	x	x	x	38	2.278	3.953	335	84.7458	0.576271	1
12	1	105.6	0	105.6	0	2	2	1	2	0	1	0	1	x	1	1	3	57	5.04	2.52	215	85.3175	2	1
13	1	43	1	43	1	2	2	x	x	x	x	x	x	x	x	x	x	63	3.417	2.747	236	85.9119	1.2439	1
14	1	113.3	1	113.3	1	2	2	x	x	x	x	x	1	x	x	x	x	55	3.354	4.128	355	85.9981	0.8125	1
15	1	33.1	1	33.1	1	2	1	1	1	0	1	1	x	x	0	0	1	56	3.038	2.542	223	87.7262	1.19512	1
16	1	28.5	1	28.4	1	2	1	1	2	0	1	0	1	1	0	1	2	50	3.528	1.953	178	91.1418	1.80645	1
17	1	152.3	1	152.3	1	2	1	1	2	0	1	x	1	x	1	1	2	64	5.4439	3.333	304	91.2091	1.63333	1
18	1	139.6	1	139.6	1	2	1	1	x	x	x	x	x	x	x	x	x	46	4.756	2.296	213	92.77	2.07143	1
19	1	55.2	1	55.2	1	2	1	x	x	x	x	x	x	x	x	x	x	70	3.135	1.815	170	93.6639	1.72727	1
20	1	16.9	1	12.4	1	2	2	1	1	1	2	0	1	1	1	1	1	59	6.435	2.376	225	94.697	2.70833	1
21	1	59	1	9.9	1	2	1	2	1	0	1	0	1	x	0	1	0	62	4.402	1.988	189	95.0704	2.21429	1
22	1	60.5	0	60.5	0	2	2	1	1	1	2	0	x	x	0	1	3	61	10.419	3.322	316	95.1234	3.13636	1
23	1	136.4	0	136.4	0	2	1	2	3	0	2	1	1	x	0	1	1	62	3.111	2.318	227	97.9292	1.34211	1
24	1	54.3	1	54.3	1	2	1	1	2	2	3	0	1	0	1	1	2	66	8.19	2.457	242	98.4941	3.33333	1
25	1	106	1	106	1	2	2	1	x	x	x	x	x	x	x	x	x	53	4.212	4.968	491	98.8325	0.847826	1
26	1	37.7	1	15.3	1	2	1	1	1	0	1	1	1	1	1	1	1	54	6.624	1.92	195	101.562	3.45	1
27	1	18.5	1	16.4	1	2	1	1	x	0	x	1	1	0	0	1	2	65	4.543	1.925	197	102.338	2.36	1
28	1	214.2	1	214.2	1	2	1	1	2	1	2	x	x	x	0	1	2	50	12.0432	2.5896	266	102.719	4.6506	1
29	1	14.8	1	8.1	1	2	1	1	x	0	x	1	1	1	0	1	2	57	6.351	1.566	163	104.087	4.05556	1
30	1	71.3	0	71.3	0	2	1	2	3	0	2	0	1	x	0	1	1	74	5.166	1.886	199	105.514	2.73913	1
31	1	73.6	1	73.6	1	2	1	1	2	1	2	1	1	1	0	1	2	51	6.072	1.936	205	105.888	3.13636	1
32	1	156.9	0	156.9	0	2	2	1	1	0	1	1	1	x	1	1	1	56	4.536	2.016	214	106.151	2.25	1
33	1	137.8	0	68.8	1	2	2	1	1	0	1	0	1	1	1	1	1	47	3.84	1.92	209	108.854	2	1
34	1	14.1	1	14.1	1	2	1	x	1	0	1	1	1	1	1	1	0	50	3.55	2.627	286	108.869	1.35135	1
35	1	22.5	1	6.8	1	2	1	x	2	1	2	1	1	1	1	1	1	55	4.176	2.016	223	110.615	2.07143	1
36	1	17.8	1	17.8	1	2	1	1	1	0	1	0	1	x	1	1	2	72	2.891	1.372	152	110.787	2.10714	1
37	1	107.9	1	107.9	1	2	1	1	1	1	2	1	x	x	x	x	x	50	5.46	2.548	283	111.068	2.14286	1
38	1	6.4	1	1.6	1	2	1	1	x	x	x	1	0	1	0	1	2	43	3.71	2.45	274	111.837	1.51429	2
39	1	61.3	1	61.3	1	2	1	1	1	1	2	0	1	1	0	1	1	53	9.585	3.105	348	112.077	3.08696	2
40	1	32.8	1	32.8	1	2	1	1	x	2	x	x	3	x	x	1	x	57	4.56	2.32	263	113.362	1.96552	2
41	1	96.3	1	83.7	1	2	1	x	3	2	3	0	1	1	1	1	1	57	6.435	2.673	319	119.342	2.40741	2
42	1	96.3	1	83.7	1	2	1	x	2	2	3	0	1	1	1	1	1	57	6.435	2.673	319	119.342	2.40741	2
43	1	182.9	1	182.9	1	2	1	x	1	0	1	1	x	x	x	x	x	x	1.68	1.806	216	119.601	0.930233	2
44	1	21.3	1	7	1	2	2	1	0	0	x	1	0	0	x	x	x	55	9.453	2.74	339	123.723	3.45	2
45	1	1.3	1	1.3	1	3	1	x	2	0	1	1	x	x	1	1	1	61	6.534	2.079	263	126.503	3.14286	2
46	1	96.2	0	96.2	0	3	2	1	1	1	2	0	1	x	1	1	1	40	4.641	3.276	418	127.595	1.41667	2
47	1	18	1	18	1	2	2	1	2	0	1	1	1	x	0	1	2	66	8.424	1.404	181	128.917	6	2
48	1	34.9	1	34.9	1	2	1	1	1	0	1	0	1	x	0	0	1	54	3.9	1.62	209	129.012	2.40741	2
49	1	169.9	1	169.9	1	2	1	1	1	0	1	1	1	1	0	1	2	66	4.071	2.07	268	129.469	1.96667	2
50	1	19.6	1	15.2	1	3	1	2	4	1	3	0	1	x	0	1	2	72	5.293	1.817	238	130.985	2.91304	2
51	1	18.6	1	18.6	1	3	1	x	3	1	3	0	x	x	0	1	1	55	18.798	2.41	330	136.929	7.8	2
52	1	37.6	0	37.6	0	2	2	1	2	1	2	0	1	0	1	1	2	62	4.836	2.418	334	138.131	2	2
53	1	61.7	1	61.7	1	3	1	1	1	1	2	0	1	x	0	0	1	62	3.42	1.8	255	141.667	1.9	2
54	1	73.2	0	73.2	0	2	1	1	1	0	1	0	1	0	0	1	1	61	7.56	1.68	243	144.643	4.5	2
55	1	9.3	1	9.3	1	2	2	1	2	1	2	1	1	1	1	1	3	56	3.575	1.485	218	146.801	2.40741	2
56	1	52.9	1	41.3	1	2	2	x	2	1	2	1	1	x	0	0	1	55	3.782	1.952	288	147.541	1.9375	2
57	1	23	1	23	1	2	1	x	4	2	3	x	x	x	x	x	x	68	2.322	2.214	329	148.6	1.04878	2
58	1	20.3	1	20.3	1	2	2	x	3	1	3	0	x	x	0	1	2	55	3.942	2.409	358	148.609	1.63636	2
59	1	39.4	1	39.4	1	2	1	1	2	x	x	1	x	x	x	x	x	48	1.8	2.05	310	151.22	0.878049	2
60	1	40.4	1	18.8	1	3	1	1	4	1	3	0	1	0	0	1	3	63	4.736	1.024	165	161.133	4.625	2
61	1	165.4	0	165.4	0	3	1	2	3	1	3	1	1	x	1	1	1	52	13.783	1.969	352	178.771	7	2
62	1	174.3	0	174.3	0	2	2	x	1	1	2	1	x	x	1	0	1	55	4.68	1.872	342	182.692	2.5	2
63	1	39.6	1	39.6	1	2	1	1	x	0	x	x	x	x	x	x	x	x	4.422	1.32	245	185.606	3.35	2
64	1	29.1	1	11.2	1	2	1	x	2	1	2	1	1	1	1	0	1	58	6.09	1.74	350	201.149	3.5	2
65	1	25.1	1	23.6	1	2	1	x	1	0	1	1	1	x	1	0	2	57	3.588	1.144	236	206.294	3.13636	2
66	1	25.7	1	25.7	1	2	1	x	2	2	3	1	1	x	0	1	1	48	4.42	1.564	361	230.818	2.82609	2
67	1	12	1	8	1	2	1	x	3	1	3	1	1	1	1	1	2	66	6.006	2.366	607	256.551	2.53846	2
68	1	4.9	1	4.9	1	2	2	x	2	2	3	0	1	1	1	1	2	62	3.575	1.155	330	285.714	3.09524	2
69	1	30.7	1	30.7	1	2	2	x	1	2	3	0	x	x	1	0	0	66	4.662	1.197	413	345.029	3.89474	2
70	1	27.7	1	27.7	1	2	2	1	x	0	x	1	x	x	x	x	x	x	x	x	x	x	x	x
71	1	15.2	1	10.5	1	2	2	x	2	1	2	1	1	0	1	1	2	53	x	x	168	x	x	x
72	1	20.8	1	14.5	1	2	1	x	1	0	1	0	1	0	0	1	2	49	x	x	x	x	x	x
73	1	20.8	1	14.5	1	2	1	x	x	x	x	0	1	0	0	1	2	49	x	x	x	x	x	x
74	1	20.7	1	12.9	1	3	1	x	2	1	2	0	1	1	0	1	2	48	x	x	x	x	x	x
75	1	30.7	1	30.7	1	2	2	x	1	1	2	1	x	x	x	x	x	49	x	x	x	x	x	x
76	1	273.3	1	273.3	1	2	1	1	4	1	3	1	x	x	0	1	0	52	x	x	x	x	x	x
77	1	26.8	1	3.3	1	2	1	x	3	0	2	1	1	x	1	1	1	54	x	x	x	x	x	x
78	1	299.8	1	299.8	1	2	1	x	2	x	x	x	x	x	x	x	x	67	x	x	x	x	x	x
79	1	54.2	1	54.2	1	2	1	x	3	1	3	1	1	x	1	1	2	57	x	x	x	x	x	x
80	1	270.1	1	270.1	1	2	1	x	2	0	1	x	1	x	x	1	x	60	x	x	x	x	x	x
81	1	120.8	1	120.8	1	2	1	1	2	0	1	x	x	x	0	1	3	64	x	x	x	x	x	x
82	1	18	1	18	1	2	2	1	3	0	2	x	x	x	0	1	2	79	x	x	x	x	x	x
83	1	55.1	1	55.1	1	2	1	1	2	1	2	1	x	x	0	1	0	52	x	x	x	x	x	x
84	1	19.4	1	11	1	2	2	2	1	1	2	0	1	1	0	1	1	57	x	x	x	x	x	x
85	1	203.2	1	203.2	1	2	1	x	1	0	1	x	3	x	0	1	3	58	x	x	x	x	x	x
86	1	236.3	1	236.3	1	2	1	1	2	0	1	x	3	x	0	1	2	63	x	x	x	x	x	x
87	1	66.8	1	14.6	1	3	2	x	4	1	3	1	1	1	1	1	2	54	x	x	x	x	x	x
88	1	341.2	1	341.2	1	2	2	1	2	0	1	x	x	x	x	1	x	57	x	x	x	x	x	x
89	1	202.4	0	202.4	0	2	1	2	2	0	1	0	1	x	0	1	2	70	x	x	224	x	x	x
90	1	118.5	0	18.4	1	2	1	x	3	2	3	0	1	1	x	x	x	50	x	x	x	x	x	x
91	1	111.1	0	111.1	0	2	2	x	x	x	x	0	0	0	0	1	1	61	x	x	x	x	x	x
1001	2	53.2	1	53.2	1	2	1	1	2	0	1	1	0	1	x	1	x	66.26	5.06	2.24	143	63.8393	2.25893	1
1002	2	105	0	105	0	2	2	1	2	0	1	0	1	1	x	1	x	66.99	4.06	3.63	269	74.1047	1.11846	1
1003	2	216.4	1	216.4	1	2	1	1	3	0	2	0	1	0	x	1	x	72.36	4.2	3.2	262	81.875	1.3125	1
1004	2	7.6	1	5.4	1	2	2	1	2	0	1	0	1	1	x	1	x	59.04	3.2	2.29	193	84.2795	1.39738	1
1005	2	18.6	0	18.6	0	2	1	1	2	2	3	0	1	0	x	x	x	67.54	5.64	2.13	184	86.385	2.64789	1
1006	2	7.1	0	7.1	0	2	1	1	2	0	1	0	1	0	x	x	x	72.83	3.31	1.91	171	89.5288	1.73298	1
1007	2	107.1	1	107.1	1	3	2	1	3	1	3	0	1	1	x	1	x	69.72	3.93	1.83	164	89.6175	2.14754	1
1008	2	20.8	1	9.9	1	2	1	1	2	0	1	0	1	0	x	1	x	81.01	11.2	1.62	154	95.0617	6.91358	1
1009	2	13.9	0	13.9	0	2	1	1	2	0	1	0	1	0	x	1	x	53.32	6.27	1.92	193	100.521	3.26562	1
1010	2	82.1	1	82.1	1	3	1	1	2	1	2	0	0	0	x	1	x	55.56	3.34	1.53	162	105.882	2.18301	1
1011	2	10.6	1	9.5	1	2	1	1	2	2	3	1	0	1	x	x	x	70.12	3.11	1.5	160	106.667	2.07333	1
1012	2	13.9	0	13.9	0	2	1	1	1	0	1	0	1	0	x	1	x	68.41	3.25	2.26	243	107.522	1.43805	1
1013	2	70.3	1	70.3	1	2	1	1	2	1	2	0	0	0	x	0	x	62.43	4.4	2.1	232	110.476	2.09524	1
1014	2	88.9	0	88.9	0	2	1	1	4	1	3	1	1	1	x	1	x	51.15	4.01	2.53	281	111.067	1.58498	1
1015	2	31.5	0	31.5	0	2	1	1	2	1	2	0	1	0	x	1	x	65.95	7.52	2.71	302	111.439	2.77491	2
1016	2	50.3	0	50.3	0	3	1	1	4	2	3	1	0	1	x	x	x	57.28	3.82	1.63	183	112.27	2.34356	2
1017	2	2.6	1	2.6	1	2	2	1	3	2	3	0	1	1	x	1	x	71.76	4.13	1.97	223	113.198	2.09645	2
1018	2	30.3	1	30.3	1	2	1	1	1	2	3	0	1	0	x	1	x	72.79	10.01	2.93	333	113.652	3.41638	2
1019	2	31.7	1	31.7	1	3	1	1	3	1	3	1	0	0	x	1	x	46.9	2.81	1.95	223	114.359	1.44103	2
1020	2	9.3	1	5.4	1	2	1	1	1	0	1	1	0	0	x	x	x	66.57	6.8	1.6	187	116.875	4.25	2
1021	2	19.8	1	17.4	1	2	1	1	2	2	3	0	1	1	x	x	x	68.71	5.1	2.6	317	121.923	1.96154	2
1022	2	3.5	1	2.5	1	2	1	1	2	0	1	0	0	0	x	1	x	72.54	5.86	2.77	345	124.549	2.11552	2
1023	2	68.4	1	68.4	1	2	1	1	1	0	1	0	0	0	x	1	x	69.32	7.28	1.26	176	139.683	5.77778	2
1024	2	44.5	1	44.5	1	2	1	1	2	0	1	0	1	0	x	1	x	77.83	14.23	1.71	264	154.386	8.32164	2
1025	2	64.9	1	64.9	1	2	1	1	1	0	1	0	1	1	x	0	x	70.61	6.8	1.68	260	154.762	4.04762	2
1026	2	147	1	147	1	2	1	1	2	0	1	0	1	0	x	1	x	72.08	2.8	1.49	257	172.483	1.87919	2
1027	2	71.5	x	71.5	0	2	1	1	4	0	3	1	0	1	x	1	x	52.06	4.18	0.95	168	176.842	4.4	2
1028	2	18.1	0	18.1	0	2	1	1	2	0	1	0	1	0	x	0	x	50.89	5.05	2.22	404	181.982	2.27477	2
1029	2	47.5	1	23.9	1	2	2	1	2	2	3	0	1	1	x	1	x	73.46	4.65	1.8	334	185.556	2.58333	2
1030	2	72.4	1	55.7	1	2	1	1	3	0	2	0	1	1	x	1	x	67.21	6.82	1.77	333	188.136	3.85311	2
1031	2	9.1	1	1.7	1	3	1	1	2	2	3	0	1	0	x	1	x	62.53	4.71	1.84	349	189.674	2.55978	2
1032	2	119.9	0	119.9	0	2	1	1	3	0	2	0	1	0	x	1	x	54.5	6.89	1.65	324	196.364	4.17576	2
1033	2	41.9	0	41.9	0	2	2	1	2	0	1	0	0	0	x	1	x	72.7	6.23	1.74	342	196.552	3.58046	2
1034	2	6.2	1	6.2	1	2	1	1	2	1	2	0	0	0	x	1	x	67.7	6.64	1.18	244	206.78	5.62712	2
1035	2	62.3	1	11.2	1	2	1	1	2	0	1	0	0	0	x	1	x	74.27	5.76	0.86	188	218.605	6.69767	2
1036	2	26.7	0	13.8	1	2	2	1	2	2	3	0	1	1	x	1	x	66.49	7.72	1.55	347	223.871	4.98065	2
1037	2	42.8	0	42.8	0	2	2	1	1	0	1	0	1	0	x	1	x	61.76	4.23	1.03	232	225.243	4.1068	2
1038	2	22.2	1	22.2	1	3	2	1	2	1	2	0	1	0	x	x	x	67.93	3.22	1.36	307	225.735	2.36765	2
1039	2	7.1	1	7.1	1	2	1	1	3	0	2	0	0	0	x	0	x	76.26	5.39	0.77	177	229.87	7	2
1040	2	105.7	0	105.7	0	2	2	1	1	0	1	0	0	0	x	x	x	58.84	2.81	1.36	346	254.412	2.06618	2
1041	2	31.5	0	31.5	0	2	1	1	2	0	1	0	1	0	x	1	x	73.94	6.99	1.13	294	260.177	6.18584	2
1042	2	144.5	1	144.5	1	2	1	1	3	0	2	0	0	0	x	1	x	66.3	9.55	0.99	315	318.182	9.64646	2
1043	2	95.8	1	95.8	1	2	1	1	1	1	2	0	1	1	x	x	x	49.16	x	x	x	x	x	x
1044	2	30.5	1	21.1	1	2	2	1	1	2	3	0	1	1	x	0	x	59.22	3.55	0	236	x	x	x
1045	2	32.4	1	32.4	1	2	2	1	4	1	3	0	0	0	x	0	x	65.84	x	x	x	x	x	x
1046	2	11.9	1	5.9	1	2	1	1	4	0	3	1	1	1	x	1	x	65.13	x	x	x	x	x	x
1047	2	12	1	12	1	2	1	1	3	2	3	0	0	0	x	x	x	71.18	x	x	x	x	x	x
1048	2	7.4	1	7.4	1	2	1	1	2	0	1	0	0	0	x	1	x	68.36	x	x	x	x	x	x
1049	2	8.1	1	6.6	1	2	1	1	4	0	3	1	0	1	x	0	x	63.06	4.18	x	239	x	x	x
1050	2	107.8	1	107.8	1	2	2	1	2	0	1	1	0	0	x	x	x	58.52	x	x	x	x	x	x
1051	2	136.7	x	136.7	0	2	1	1	1	2	3	1	0	0	x	1	x	59.35	x	x	x	x	x	x
1052	2	109.3	1	109.3	1	2	2	1	3	2	3	0	0	0	x	1	x	71.96	x	x	x	x	x	x
1053	2	62.4	1	59.2	1	2	1	0	2	2	3	0	0	0	x	1	x	60.89	4.02	x	153	x	x	x
1054	2	141.4	0	141.4	0	2	1	1	2	0	1	0	0	0	x	1	x	71.08	x	x	x	x	x	x
2001	3	11	1	5	1	2	1	1	2	1	2	0	1	0	0	0	0	50	3.9	3.2	140	43.75	1.21875	1
2002	3	105	0	105	0	2	2	0	1	0	1	0	0	0	0	0	0	66	3.4	2.3	131	56.9565	1.47826	1
2003	3	24	1	23	1	2	1	1	1	0	1	0	1	0	0	1	0	49	8.06	3.78	220	58.2011	2.13228	1
2004	3	58	0	58	0	2	1	1	2	0	1	0	1	0	0	0	0	58	5.07	4.83	334	69.1511	1.04969	1
2005	3	50	0	50	0	3	1	1	3	1	3	0	1	0	0	0	0	58	4.06	3.4	248	72.9412	1.19412	1
2006	3	72	0	72	0	2	1	0	2	1	2	0	1	0	x	x	x	49	5.1	2.4	180	75	2.125	1
2007	3	78	0	78	0	2	1	1	0	1	x	0	1	0	0	1	0	59	3.9	2.6	207	79.6154	1.5	1
2008	3	169	0	169	0	2	1	2	2	1	2	0	1	0	0	0	0	55	5.19	2.38	190	79.8319	2.18067	1
2009	3	11	1	11	1	2	1	1	2	2	3	0	1	0	0	1	0	44	3.28	2.61	213	81.6092	1.2567	1
2010	3	1	1	1	1	3	1	1	3	2	3	0	0	0	x	x	x	63	4.6	2.3	190	82.6087	2	1
2011	3	3	1	1	1	3	1	1	2	2	3	0	1	0	0	0	0	48	7.6	3.09	257	83.1715	2.45955	1
2012	3	10	1	10	1	2	1	1	2	2	3	0	1	1	0	0	0	52	5.17	1.89	166	87.8307	2.73545	1
2013	3	32	1	14	1	2	2	0	1	1	2	0	1	0	0	1	0	52	5.4	2.02	187	92.5743	2.67327	1
2014	3	24	1	16	1	3	2	0	2	0	1	1	1	1	0	0	0	55	4.31	2.14	199	92.9907	2.01402	1
2015	3	3	1	2	1	2	1	0	2	1	2	0	1	0	0	0	0	45	4.49	2.14	200	93.4579	2.09813	1
2016	3	61	0	61	0	2	1	2	2	0	1	0	0	0	0	0	0	66	4.08	2.39	225	94.1423	1.70711	1
2017	3	49	1	46	1	3	1	1	3	0	2	0	0	0	0	1	0	44	5.61	2.1	198	94.2857	2.67143	1
2018	3	1	0	1	0	3	1	1	2	2	3	0	1	0	0	1	0	43	4.55	2.27	217	95.5947	2.00441	1
2019	3	159	0	159	0	2	1	1	2	0	1	0	0	0	x	x	x	67	5.05	1.8	175	97.2222	2.80556	1
2020	3	75	0	75	0	2	1	0	2	0	1	0	1	1	1	0	1	50	3.92	2.52	247	98.0159	1.55556	1
2021	3	9	1	8	1	3	1	1	2	1	2	0	0	0	0	1	0	52	6.1	3	297	99	2.03333	1
2022	3	130	0	130	0	2	1	0	2	2	3	0	1	0	x	x	x	56	4.1	2.2	220	100	1.86364	1
2023	3	46	1	23	1	2	1	0	0	1	x	0	1	1	0	1	0	49	4.7	2.2	230	104.545	2.13636	1
2024	3	80	1	73	1	2	1	1	2	0	1	0	1	0	x	x	x	57	4.14	3.24	341	105.247	1.27778	1
2025	3	49	0	32	1	2	1	1	3	0	2	0	1	0	x	x	x	54	4.5	2	220	110	2.25	1
2026	3	2	0	2	0	3	1	1	2	2	3	0	1	0	0	0	0	42	6.37	2.35	262	111.489	2.71064	2
2027	3	128	0	128	0	3	1	1	2	1	2	0	1	0	0	0	1	51	4.48	1.61	180	111.801	2.78261	2
2028	3	2	0	2	0	3	1	1	3	1	3	0	1	0	0	0	0	58	4.29	2.66	303	113.91	1.61278	2
2029	3	8	0	8	0	3	1	1	1	0	1	1	1	1	1	1	0	54	6	2.5	295	118	2.4	2
2030	3	9	1	6	1	3	1	1	2	2	3	0	0	0	x	x	x	54	4.6	2.1	250	119.048	2.19048	2
2031	3	15	1	14	1	3	1	1	2	1	2	0	1	1	0	0	0	56	8.1	2.5	318	127.2	3.24	2
2032	3	13	1	11	1	2	1	1	2	2	3	0	1	1	1	1	2	57	5	2	264	132	2.5	2
2033	3	90	0	90	0	2	2	0	2	0	1	0	0	0	0	1	0	54	3.5	2.2	301	136.818	1.59091	2
2034	3	75	0	75	0	2	1	2	1	0	1	0	1	1	x	x	x	48	4.7	2.1	290	138.095	2.2381	2
2035	3	75	0	75	0	2	2	0	1	0	1	0	0	0	x	x	x	63	3.9	1.9	280	147.368	2.05263	2
2036	3	19	1	18	1	3	1	1	2	0	1	0	0	0	x	x	x	44	5.01	2.36	350	148.305	2.12288	2
2037	3	5	0	5	0	2	1	1	1	0	1	0	1	0	x	x	x	63	3.55	2.34	351	150	1.51709	2
2038	3	25	1	24	1	2	1	2	2	0	1	0	0	0	0	0	0	51	3.77	2.17	340	156.682	1.73733	2
2039	3	36	1	36	1	3	1	1	2	0	1	0	0	0	x	x	x	65	5.53	3.62	589	162.707	1.52762	2
2040	3	141	0	8	1	2	1	1	2	0	1	0	1	0	0	1	1	45	7.63	3.38	550	162.722	2.2574	2
2041	3	112	0	112	0	2	2	0	2	0	1	0	1	0	0	0	0	50	2.23	1.39	227	163.309	1.60432	2
2042	3	99	0	99	0	3	1	1	2	2	3	0	1	1	0	0	0	52	6.7	2.5	413	165.2	2.68	2
2043	3	4	1	3	1	3	1	1	3	2	3	0	0	0	0	0	0	63	3.17	0.97	240	247.423	3.26804	2
2044	3	98	1	98	1	2	2	0	2	2	3	0	1	0	0	0	0	44	6.3	1.9	545	286.842	3.31579	2
